# Supplementary material
Source: publisher figshare collection journal article supplement (https://springernature.figshare.com/ndownloader/files/20990406)
Supplement: Supplementary file [file 20990406]

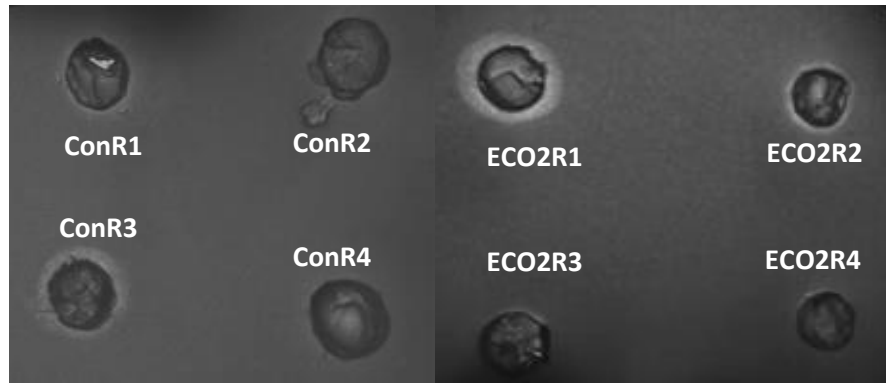

**Plate S1.** Lytics zones on gel plates 48 hours after innoculation. Con - Ambient CO<sub>2</sub> (water pH=7) and water temperature at  $29 \pm 1^{\circ}\text{C}$ ; ECO2 – CO<sub>2</sub> bubbled to water to maintain pH at 5.5-5.6. R1 – R4 – Replicates.
